# Supplementary material
Source: MDPI journal article supplement (https://www.mdpi.com/2071-1050/9/5/721)
Supplement: s1 [file s1]

Supplementary File

**Review:** Lessons for Responsible Innovation in the Business Context: A Systematic Literature Review of Responsible, Social and Sustainable Innovation Practices

**Topic:** This involves a systematic literature review of empirical articles in which social-, sustainable- or responsible innovation are investigated, where (people coming from) businesses are (among the) respondents. The review is delimited to the ‘Global North’ as only studies are included that focus on innovation practices and processes taking place in the United States, Canada, Europe, Australia and New Zealand.

**Target journal:** Sustainability and in particular the special issue "Responsible Research and Innovation (RRI) in Industry"

**Main Concepts:** Social innovation, sustainable innovation and responsible innovation


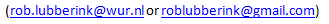
**Keywords:** please see the graphical representation of each search string employed for each of the three main concepts investigated in this review. This can be found at the end of this supplementary file.

**Corresponding author:** Rob Lubberink

## Research processes behind this systematic literature review

The initial aim of the systematic literature review was to develop definitions and operationalisations of each dimension of the framework of responsible innovation introduced by Stilgoe et al. (2013). However, after discussion among the authors of this review, the contributors agreed that the main added value of the review should be the actual synthesis of innovation practices and processes published in the empirical articles. The primary focus should therefore not be to add to the discussion on definitions and conceptualisations of responsible innovation. Instead, the main added value would be to add to the discussion on how responsible innovation could be applied in the business context.

Stage 1: In a preceding preparatory study, the authors of this paper first conducted conceptual analyses of the three main concepts of this review: social-, sustainable- and responsible innovation; this to identify conceptual similarities and dissimilarities between responsible innovation and social- and sustainable innovation. The purpose of these conceptual analyses was to determine whether previous publications on social- and sustainable innovation could serve as informative resources to understand responsible innovation in the business context. The results from the conceptual analyses are published in a separate publication to too prevent the review from becoming too complex.

Stage 2: The results derived from the conceptual analyses suggested to use social- and sustainable innovation as resources for the systematic literature review. The corresponding author completed a course on ‘systematic literature reviewing’ and the co-authors already had previous experience with systematic literature reviewing. Furthermore, the corresponding author developed the search strings that were used for the literature search in close collaboration with the University expert in systematic literature reviewing. The keywords were also determined based on discussions with the other co-authors who have expertise in innovation in general, and responsible innovation in particular. Also the databases were determined based on conversations with co-authors, academic librarians and the expert in systematic literature reviews. Furthermore, the approach for literature synthesis was determined after discussions with the co-authors and the expert in systematic literature reviewing.

Stage 3: The title, abstracts and keywords were downloaded from all 1210 articles that resulted from SCOPUS, Web of Science, Abi/Inform and Bielefeld Academic Search Engine (the latter only for responsible innovation literature). Subsequently, this information was imported in Endnote. Duplicates were both manually removed and based on Endnote software. Within Endnote, the 1210 articles were subdivided in different maps based on the inclusion and exclusion criteria expressed in the paper (please contact the corresponding author for access to the endnote file). A subset of the title-abstract-keywords were screened based on inclusion and exclusion criteria by three co-authors. Based on discussions, the rest was screened by the corresponding author. (In a later stage, another search for responsible innovation literature took place since the concept received increasing interest over the last years). Another assessment took place to remove duplicates. Ultimately, this resulted in a selection of papers that were deemed appropriate for full paper analysis.

Stage 4: The articles that were selected for full paper analyses were downloaded. Articles that were not accessible online were requested by the authors and in most cases received upon request. These requests were handled by the university library of the Wageningen University. Unfortunately, there were very few cases in which the articles were not accessible, even after request.

Stage 5: The full papers were subject to critical appraisal. The necessary condition for inclusion was: is this article truly usable for the purpose of the systematic literature review? If this condition was not met, the article was excluded from further appraisal. The articles that did meet the necessary condition were also subject to: can the article be appraised? Is it well executed? And does the article approach fit with the article purpose. (Please contact the corresponding authors for access to the critical appraisal).

Stage 6: The full papers that were usable and met the other criteria were included for synthesis. The synthesis was an iterative process where the authors discussed the findings of the reviewed articles, and whether they could be considered to benefit: anticipation, reflexivity, inclusion and deliberation and responsiveness. Furthermore, discussions took place with regard to ‘knowledge management’ and whether it was an additional element next to the initial framework that was used for reviewing the literature. Hence, the review involved deductive and inductive analyses of the included articles. The corresponding authors took the lead and made use of Atlas.ti to analyse the articles for synthesis.

Stage 7: After discussion there was agreed upon that knowledge management focused on solving practical knowledge problems could be considered as an essential dimension of responsible innovation that was not covered by the initial dimensions. Subsequently, there was decided to review these knowledge management practices using based on the “knowledge‐based dynamic capabilities typology” proposed by Denford (2013).

Stage 8: There was discussion among the authors what the main results were that had to be included in the results of the systematic literature review. Subsequently, the results from synthesis were written and refined based on discussions among all authors. This includes the analyses of, and the reporting of, the descriptive information of the articles included in the systematic literature review. Each dimension of responsible innovation, including knowledge management, is covered in the results section based on the innovation practices and processes that could help its implementation. Each dimension is complemented with a table that serves as an overview of key activities and strategies to implement these dimensions, including recommendations for articles that discuss these activities and strategies.

Stage 9: Based on the results found, and knowledge gaps identified, conclusions could be drawn and recommendations for further research were derived. Subsequently, the paper was submitted for publication and the special issue on ‘Responsible Research and Innovation (RRI) in Industry’ was selected as the target for publication.

Stage 10: The first round of revisions took place based on the comments of three reviewers. The following main actions and revisions were undertaken based on the comments of the reviewers.

- Proofreading and language editing by an external Native English language editor
- Clear articulation that this review focuses on social-, sustainable- and responsible innovation practices in the business context, given the current political and socio-economic system.
- Additional search to check the comprehensiveness of the current keywords and electronic databases. This was deemed appropriate.
- Updating the systematic literature review for the latest empirical articles on responsible innovation in the business context. Furthermore, including reports published by research projects on responsible innovation for the latest insights. The decision was made to cover these insights in the conclusion and discussion.
- The conceptual similarities and dissimilarities between responsible innovation and social- and sustainable innovation was requested to be accompanied by a table with an overview in the Appendix.
- Discussing the fact that responsible innovation is also a political concept in general, and what that means for innovations for sustainability in particular.
- Rephrasing statements to prevent misunderstanding (i.e. better articulating the purpose of the review, the conclusions that could be drawn and the scientific and practical relevance).
- Discuss the role of open innovation when it comes to interpretation of the results

Stage 11: Another round of language editing took place by a native British language editor. Subsequently, proofreading of the manuscript took place before final publication of the systematic literature review. Only minor changes took place.

## All included articles that served as a source for the literature synthesis

Acs, Z J, and J Sany. 2009. ‘Measuring the Social Value of Innovation: The Cases of Muhammad Yunus, Grameen Bank and Bill Gates, Microsoft’. In *Measuring the Social Value of Innovation: A Link in the University Technology Transfer and Entrepreneurship Equation*, 19:143–70. doi:10.1108/s1048-4736(2009)0000019006.

Andersson, E R, J Lundblad, and B Jansson. 2012. ‘A Public Arena for Sustainable Health and Safety Innovation: Guidelines for Research and Practice’. *International Journal of Innovation and Sustainable Development* 6 (3): 324–43. doi:10.1504/IJISD.2012.047889.

Armstrong, Margaret, Guillaume Cornut, Stéphane Delacôte, Marc Lenglet, Yuval Millo, Fabian Muniesa, Alexandre Pointier, and Yamina Tadjeddine. 2012. ‘Towards a Practical Approach to Responsible Innovation in Finance: New Product Committees Revisited’. *Journal of Financial Regulation and Compliance* 20 (2). London: Emerald Group Publishing, Limited: 147–68. doi:http://dx.doi.org/10.1108/13581981211218289.

Arnold, M. 2010. ‘Corporate Strategies for Sustainable Innovations’. In *Facilitating Sustainable Innovation through Collaboration*, 217–32. Springer Netherlands. doi:10.1007/978-90-481-3159-4_12.

Arnold, Marlen Gabriele, and Kai Hockerts. 2011. ‘The Greening Dutchman: Philips’ Process of Green Flagging to Drive Sustainable Innovations’. *Business Strategy and the Environment* 20 (6): 394–407. doi:10.1002/bse.700.

Asante, Keren, Richard Owen, and Glenn Williamson. 2014. ‘Governance of New Product Development and Perceptions of Responsible Innovation in the Financial Sector: Insights from an Ethnographic Case Study’. *Journal of Responsible Innovation* 1 (1): 9–30. doi:10.1080/23299460.2014.882552.

Ayuso, Silvia, Miguel Ángel Rodríguez, Roberto García-Castro, and Miguel Ángel Ariño. 2011. ‘Does Stakeholder Engagement Promote Sustainable Innovation Orientation?’ *Industrial Management and Data Systems* 111 (9): 1399–1417. doi:10.1108/02635571111182764.

Baba, Yasunori, and John P. Walsh. 2010. ‘Embeddedness, Social Epistemology and Breakthrough Innovation: The Case of the Development of Statins’. *Research Policy* 39 (4): 511–22. doi:10.1016/j.respol.2010.01.016.

Balka, Kerstin, Christina Raasch, and Cornelius Herstatt. 2014. ‘The Effect of Selective Openness on Value Creation in User Innovation Communities’. *Journal of Product Innovation Management* 31 (2): 392–407. doi:10.1111/jpim.12102.

Bartlett, Dean. 2009. ‘Embedding Corporate Responsibility: The Development of a Transformational Model of Organizational Innovation’. *Corporate Governance* 9 (4). Bradford: Emerald Group Publishing, Limited: 409–20. doi:10.1108/14720700910984963.

Berker, Thomas. 2010. ‘Dealing with Uncertainty in Sustainable Innovation: Mainstreaming and Substitution’. *International Journal of Innovation and Sustainable Development* 5 (1): 65–79. doi:10.1504/IJISD.2010.034558.

Biondi, Vittorio, Fabio Iraldo, and Sandra Meredith. 2002. ‘Achieving Sustainability through Environmental Innovation: The Role of SMEs’. *International Journal of Technology Management* 24 (5–6): 612–26. doi:10.1504/IJTM.2002.003074.

Blok, Vincent, Linda Hoffmans, and E.F.M. F M Wubben. 2015. ‘Stakeholder Engagement for Responsible Innovation in the Private Sector: Critical Issues and Management Practices’. *Journal on Chain and Network Science* 15 (2). Wageningen U: 147–64. doi:10.3920/JCNS2015.x003.

Blum-Kusterer, Martina, and S Salman Hussain. 2001. ‘Innovation and Corporate Sustainability: An Investigation into the Process of Change in the Pharmaceuticals Industry’. *Business Strategy and the Environment* 10 (5). Chichester: Wiley Periodicals Inc.: 300–316. http://search.proquest.com/docview/213771423?accountid=27871.

Bocken, N. M P, M. Farracho, R. Bosworth, and R. Kemp. 2014. ‘The Front-End of Eco-Innovation for Eco-Innovative Small and Medium Sized Companies’. *Journal of Engineering and Technology Management - JET-M* 31: 43–57. doi:10.1016/j.jengtecman.2013.10.004.

Bocken, Nancy, Samuel Short, Padmakshi Rana, and Steve Evans. 2013. ‘A Value Mapping Tool for Sustainable Business Modelling’. *Corporate Governance* 13 (5). Bradford: Emerald Group Publishing, Limited: 482–97. doi:10.1108/CG-06-2013-0078.

Bos-Brouwers, Hilke Elke Jacke. 2010. ‘Corporate Sustainability and Innovation in SMEs: Evidence of Themes and Activities in Practice’. *Business Strategy and the Environment* 19 (7): 417–35. doi:10.1002/bse.652.

Bridgstock, Ruth, Fiona Lettice, Mustafa F. Özbilgin, Ahu Tatli, Mustafa F Oezbilgin, and Ahu Tatli. 2010. ‘Diversity Management for Innovation in Social Enterprises in the UK’. *Entrepreneurship & Regional Development* 22 (6). Routledge: 557–74. doi:10.1080/08985626.2010.488404.

Carrillo-Hermosilla, Javier, Pablo Del Río, and Totti Könnölä. 2010. ‘Diversity of Eco-Innovations: Reflections from Selected Case Studies’. *Journal of Cleaner Production* 18 (10–11): 1073–83. doi:10.1016/j.jclepro.2010.02.014.

Chadha, Avrath. 2011. ‘Overcoming Competence Lock-In for the Development of Radical Eco-Innovations: The Case of Biopolymer Technology’. *Industry and Innovation* 18 (3): 335–50. doi:10.1080/13662716.2011.561032.

Chalmers, Dominic M., and Eva Balan-Vnuk. 2013. ‘Innovating Not-for-Profit Social Ventures: Exploring the Microfoundations of Internal and External Absorptive Capacity Routines’. *International Small Business Journal* 31 (7): 785–810. doi:10.1177/0266242612465630.

Ciasullo, M V, and O Troisi. 2013. ‘Sustainable Value Creation in SMEs: A Case Study’. *The TQM Journal* 25 (1). Bingley: Emerald Group Publishing, Limited: 44–61. doi:10.1108/17542731311286423.

Doran, Justin. 2012. ‘Regulation and Firm Perception, Eco-Innovation and Firm Performance’. *European Journal of Innovation Management* 15 (4). Bradford: Emerald Group Publishing, Limited: 421–41. doi:10.1108/14601061211272367.

Dossa, Zahir, and Katrin Kaeufer. 2014. ‘Understanding Sustainability Innovations Through Positive Ethical Networks’. *Journal of Business Ethics* 119 (4). Dordrecht: Springer Science & Business Media: 543–59. doi:10.1007/s10551-013-1834-8.

Eccles, Robert G., and George Serafeim. 2013. ‘The Performance Frontier: Innovating for a Sustainable Strategy’. *Harvard Business Review* 91 (5): 1–10.

Edwards-Schachter, Mónica E., Cristian E. Matti, and Enrique Alcántara. 2012. ‘Fostering Quality of Life through Social Innovation: A Living Lab Methodology Study Case’. *Review of Policy Research* 29 (6): 672–92. doi:10.1111/j.1541-1338.2012.00588.x.

Elmquist, Maria, and Blanche Segrestin. 2009. ‘Sustainable Development through Innovative Design: Lessons from the KCP Method Experimented with an Automotive Firm’. *International Journal of Automotive Technology and Management* 9 (2): 229–44. doi:10.1504/IJATM.2009.026399.

Evans, Stephen, Paulo J. Partidário, Joanna Lambert, Paulo J Partidario, and Joanna Lambert. 2007. ‘Industrialization as a Key Element of Sustainable Product-Service Solutions’. *International Journal of Production Research* 45 (18–19): 4225–46. doi:10.1080/00207540701449999.

Franke, Nikolaus, Peter Keinz, and Katharina Klausberger. 2013. ‘“Does This Sound Like a Fair Deal?”: Antecedents and Consequences of Fairness Expectations in the Individual’s Decision to Participate in Firm Innovation’. *Organization Science* 24 (5): 1495–1516. doi:10.1287/orsc.1120.0794.

Füller, Johann, Katja Hutter, and Mirijam Fries. 2012. ‘Crowdsourcing for Goodness Sake: Impact of Incentive Preference on Contribution Behavior for Social Innovation’. In *Advances in International Marketing*, edited by K S Swan and S Zou, 23:137–59. Emerald Group Publishing Ltd. doi:10.1108/s1474-7979(2012)0000023010.

Gaziulusoy, a. İdil, Carol Boyle, and Ron McDowall. 2013. ‘System Innovation for Sustainability: A Systemic Double-Flow Scenario Method for Companies’. *Journal of Cleaner Production* 45 (April): 104–16. doi:10.1016/j.jclepro.2012.05.013.

Haen, Dirk, Petra Sneijder, Hedwig te Molder, and Tsjalling Swierstra. 2015. ‘Natural Food: Organizing “Responsiveness” in Responsible Innovation of Food Technology’. In *Responsible Innovation 2*, edited by Bert-Jaap Koops, Ilse Oosterlaken, Henny Romijn, Tsjalling Swierstra, and Jeroen van den Hoven, 161–81. Cham, Switzerland: Springer International Publishing. doi:10.1007/978-3-319-17308-5_9.

Halila, Fawzi, and Jonas Rundquist. 2011. ‘The Development and Market Success of Eco-Innovations: A Comparative Study of Eco-Innovations and “other” Innovations in Sweden’. *European Journal of Innovation Management* 14 (3): 278–302. doi:10.1108/14601061111148807.

Halme, Minna, and Maria Korpela. 2014. ‘Responsible Innovation Toward Sustainable Development in Small and Medium-Sized Enterprises: A Resource Perspective’. *Business Strategy and the Environment* 23 (8): 547–66. doi:10.1002/bse.1801.

Hansen, Erik G, Angelika C Bullinger, and Ralf Reichwald. 2011. ‘Sustainability Innovation Contests: Evaluating Contributions with an Eco Impact-Innovativeness Typology Ralf Reichwald’. *International Journal of Innovation and Sustainable Development* 5 (2/3): 221–45. doi:<a href=‘http://dx.doi.org/10.1504/IJISD.2011.043074’>http://dx.doi.org/10.1504/IJISD.2011.043074</a>.

Harrisson, Denis, Nizar Chaari, M Comeau-Vallée, and Mariline Comeau-Vallee. 2012. ‘Intersectoral Alliance and Social Innovation: When Corporations Meet Civil Society’. *Annals of Public and Cooperative Economics* 83 (1). U Quebec, Montreal: 1–24. doi:10.1111/j.1467-8292.2011.00452.x.

Heidi von Weltzien, Hoivik. 2011. ‘Embedding CSR as a Learning and Knowledge Creating Process: The Case for SMEs in Norway’. *The Journal of Management Development* 30 (10). Bradford: Emerald Group Publishing, Limited: 1067–84. doi:http://dx.doi.org/10.1108/02621711111182547.

Jamali, Dima, Mary Yianni, and Hanin Abdallah. 2011. ‘Strategic Partnerships, Social Capital and Innovation: Accounting for Social Alliance Innovation’. *Business Ethics* 20 (4): 375–91. doi:10.1111/j.1467-8608.2011.01621.x.

Joore, Peter. 2008. ‘The V-Cycle for System Innovation Translating a Broad Societal Need into Concrete Product Service Solutions: The Multifunctional Centre Apeldoorn Case’. *Journal of Cleaner Production* 16 (11): 1153–62. doi:10.1016/j.jclepro.2007.08.007.

Kanter, R. M. 1999. ‘From Spare Change to Real Change. The Social Sector as Beta Site for Business Innovation’. *Harvard Business Review* 77 (3): 122–132,210. doi:Article.

Kesidou, Effie, and Pelin Demirel. 2012. ‘On the Drivers of Eco-Innovations: Empirical Evidence from the UK’. *Research Policy* 41 (5): 862–70. doi:10.1016/j.respol.2012.01.005.

Ketata, Ihsen, Wolfgang Sofka, and Christoph Grimpe. 2014. ‘The Role of Internal Capabilities and Firms’ Environment for Sustainable Innovation: Evidence for Germany’. *R&D Management* 45 (1): 60–75. doi:10.1111/radm.12052.

Kinder, Tony. 2010. ‘Social Innovation in Services: Technologically Assisted New Care Models for People with Dementia and Their Usability’. *International Journal of Technology Management* 51 (1): 106–20. doi:10.1504/IJTM.2010.033131.

Kiron, David, Nina Kruschwitz, Martin Reeves, and Eugene Goh. 2013. ‘The Benefits of Sustainability-Driven Innovation’. *MIT Sloan Management Review* 54 (2). Cambridge: Massachusetts Institute of Technology: 69–73. http://search.proquest.com/docview/1266765850?accountid=27871.

Lampikoski, Tommi, Mika Westerlund, Risto Rajala, and Kristian Möller. 2014. ‘Green Innovation Games: Value-Creation Strategies for Corporate Sustainability’. *California Management Review* 57 (1). University of California Press: 88–116. doi:10.1525/cmr.2014.57.1.88.

Larson, Andrea L. 2000. ‘Sustainable Innovation through an Entrepreneurship Lens’. *Business Strategy and the Environment* 9 (5). Chichester: Wiley Periodicals Inc.: 304–17. doi:10.1002/1099-0836(200009/10)9:5<304::AID-BSE255>3.0.CO;2-O.

Le Ber, M. J., and O. Branzei. 2009. ‘(Re)Forming Strategic Cross-Sector Partnerships: Relational Processes of Social Innovation’. *Business & Society* 49 (1): 140–72. doi:10.1177/0007650309345457.

Lettice, Fiona, and Menka Parekh. 2010. ‘The Social Innovation Process: Themes, Challenges and Implications for Practice’. *International Journal of Technology Management* 51 (1): 139–58. doi:10.1504/IJTM.2010.033133.

Limburg, Diana. 2014. ‘Social Innovation through Information Provision’. In *Human Resource Management, Social Innovation and Technology*, 14:2–21. Emerald Group Publishing Ltd. doi:doi:10.1108/S1877-6361_2014_0000014007.

Lopez-Berzosa, David, and Annabelle Gawer. 2014. ‘Innovation Policy within Private Collectives: Evidence on 3GPP’s Regulation Mechanisms to Facilitate Collective Innovation’. *Technovation* 34 (12): 734–45. doi:10.1016/j.technovation.2014.07.005.

Ornetzeder, Michael. 2001. ‘Old Technology and Social Innovations. Inside the Austrian Success Story on Solar Water Heaters’. *Technology Analysis & Strategic Management* 13 (1): 105–15. doi:10.1080/09537320120040473.

Ortega, Salvael, Nathan Furr, Erin Liman, and Caleb Flint. 2014. ‘The Science of Social Impact Innovation: How to Deliver More Impact through Innovative Business Models’. *International Journal of Innovation Science* 6 (2). Multi-Science Publishing Co. Ltd: 73–82. doi:10.1260/1757-2223.6.2.73.

Osch, Wietske Van, and Michel Avital. 2010. ‘The Road to Sustainable Value: The Path-Dependent Construction of Sustainable Innovation as Sociomaterial Practices in the Car Industry’. In *Positive Design and Appreciative Construction: From Sustainable Development to Sustainable Value*, edited by Tojo Thatchenkery, David L. Cooperrider, and Michel Avital, 3:99–116. Emerald Group Publishing Limited. doi:10.1108/S1475-9152(2010)0000003010.

Padgett, Robert C., and Rosamaria C. Moura-Leite. 2012. ‘Innovation with High Social Benefits and Corporate Financial Performance’. *Journal of Technology Management and Innovation* 7 (4): 59–69. http://www.scopus.com/inward/record.url?eid=2-s2.0-84872811812&partnerID=40&md5=fd1a4525a7cfd03e171548b23cb31db5.

Parry, Simon. 2012. ‘Going Green: The Evolution of Micro-Business Environmental Practices’. *Business Ethics* 21 (2): 220–37. doi:10.1111/j.1467-8608.2011.01651.x.

Pujari, Devashish. 2006. ‘Eco-Innovation and New Product Development: Understanding the Influences on Market Performance’. *Technovation* 26 (1): 76–85. doi:10.1016/j.technovation.2004.07.006.

Richter, Mario. 2013. ‘Business Model Innovation for Sustainable Energy: How German Municipal Utilities Invest in Offshore Wind Energy’. *International Journal of Technology Management* 63 (1–2): 12–15. doi:10.1504/IJTM.2013.055578.

Riivari, Elina, and Anna-maija Maija Lämsä. 2013. ‘Does It Pay to Be Ethical? Examining the Relationship Between Organisations’ Ethical Culture and Innovativeness’. *Journal of Business Ethics* 124 (1). Dordrecht: Springer Science & Business Media: 1–17. doi:10.1007/s10551-013-1859-z.

Rohrbeck, René, Lars Konnertz, and Sebastian Knab. 2013. ‘Collaborative Business Modelling for Systemic and Sustainability Innovations’. *International Journal of Technology Management* 63 (1–2): 4. doi:10.1504/IJTM.2013.055577.

Ruppel, Cynthia P., and Susan J. Harrington. 2000. ‘The Relationship of Communication, Ethical Work Climate, and Trust to Commitment and Innovation’. *Journal of Business Ethics* 25 (4): 313–28. doi:10.1023/A:1006290432594.

Scholten, V.E. E, and P.A. A van der Duin. 2015. ‘Responsible Innovation among Academic Spin-Offs: How Responsible Practices Help Developing Absorptive Capacity’. *Journal on Chain and Network Science* 15 (2). Delft U Technology: 165–79. doi:10.3920/JCNS2015.x005.

Spena, Tiziana Russo, and Alessandra De Chiara. 2012. ‘CSR, Innovation Strategy and Supply Chain Management: Toward an Integrated Perspective’. *International Journal of Technology Management* 58 (1–2): 83–108. doi:10.1504/IJTM.2012.045790.

Steen, Marc, Jan Buijs, and Doug Williams. 2014. ‘The Role of Scenarios and Demonstrators in Promoting Shared Understanding in Innovation Projects’. *International Journal of Innovation and Technology Management* 11 (1). World Scientific Publishing Co. Pte Ltd: 21. doi:10.1142/S021987701440001X.

Stuermer, Matthias, Sebastian Spaeth, and Georg von Krogh. 2009. ‘Extending Private-Collective Innovation: A Case Study’. *R&D Management* 39 (2): 170–91. doi:10.1111/j.1467-9310.2009.00548.x.

van Osch, W, and M Avital. 2010. ‘From Green IT to Sustainable Innovation’. In *16th Americas Conference on Information Systems 2010, AMCIS 2010*, 5:3737–46. Lima. http://www.scopus.com/inward/record.url?eid=2-s2.0-84870383232&partnerID=40&md5=05829b9fcf506355c47781b3020161c7.

Wagner, Marcus. 2009. ‘The Links of Sustainable Competitiveness and Innovation with Openness and User Integration: An Empirical Analysis’. *International Journal of Innovation and Sustainable Development* 4 (4): 314–29. doi:10.1504/IJISD.2009.033084.

Wagner, Marcus, and Patrick Llerena. 2011. ‘Eco-Innovation Through Integration, Regulation and Cooperation: Comparative Insights from Case Studies in Three Manufacturing Sectors’. *Industry and Innovation* 18 (8): 747–64. doi:10.1080/13662716.2011.621744.

Walter, Alexander I., and Roland W. Scholz. 2006. ‘Sustainable Innovation Networks: An Empirical Study on Interorganisational Networks in Industrial Ecology’. *Progress in Industrial Ecology, An International Journal* 3 (5): 431–50. doi:10.1504/PIE.2006.012270.

Weisenfeld, Ursula. 2012. ‘Corporate Social Responsibility in Innovation: Insights from Two Cases of Syngenta’s Activities in Genetically Modified Organisms.’ *Creativity and Innovation Management* 21 (2). Weisenfeld, Ursula: Wiley-Blackwell Publishing Ltd.: 199–211. doi:10.1111/j.1467-8691.2012.00643.x.

Wilson, F, J Post, R Grzywinski, and M Houghton. 2014. ‘Social Innovation and Investment: The ShoreBank Experience’. *Critical Studies on Corporate Responsibility, Governance and Sustainability*. Emerald Group Publishing Ltd. doi:10.1108/s2043-905920140000007003.

Wodzisz, Rafał. 2015. ‘Case Study of R-1234yf Refrigerant: Implications for the Framework for Responsible Innovation.’ *Science And Engineering Ethics* 21 (6). Faculty of Philosophy, John Paul II Catholic University of Lublin, Al. Racławickie 14, 20-950, Lublin, Poland. rafal.wodzisz@gmail.com.: Opragen Publications: 1413–33. doi:10.1007/s11948-014-9612-2.

Ziv, Nina D. 2008. ‘An Exploration on Community-Based Innovation: Indaba Music as a Case in Point’. In *PICMET: Portland International Center for Management of Engineering and Technology, Proceedings*, 593–602. Cape Town. doi:10.1109/PICMET.2008.4599668.

## Graphical representation of all search strings applied
